# Supplementary material for: Adiponectin stimulates lipid metabolism via AMPK in rabbit blastocysts
Source: PubMed Central journal article supplement — Hum Reprod. 2017 May 4;32(7):1382–92. doi: 10.1093/humrep/dex087 (PMC5850832; doi:10.1093/humrep/dex087), 2017-05-04
Supplement: dex087_suppl_figure1.pdf [file dex087_suppl_figure1.pdf]

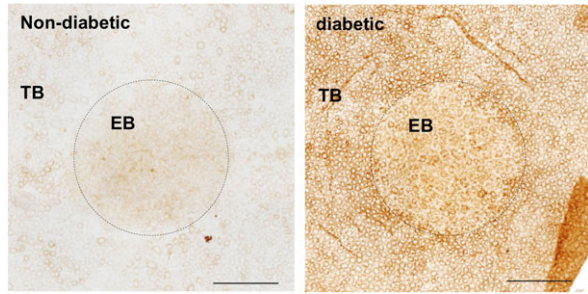

**Supplementary Figure S1** Immunohistochemical detection of carnitine palmitoyl transferase I in blastocysts from diabetic rabbits. Carnitine palmitoyl transferase I (CPTI) protein was detected by immunohistochemistry and visualized by peroxidase-diaminobenzidine reaction (brown colour, scale bar = 50  $\mu\text{m}$ ). Preparation and immunohistochemical protocol were as described (Schindler *et al.*, 2013). Antibody for CPTI (#sc-393070, Santa Cruz, Germany) was diluted 1:100 in 3% (wt/vol) bovine serum albumin/PBS. All steps were performed within the same experiment, examined microscopically during the same session, using identical microscope and camera settings (BZ8100, Keyence, Germany). In blastocysts from healthy controls (non-diabetic), CPTI was localized in the cytosol of embryoblast (EB) and trophoblast (TB) cells. In blastocysts from diabetic rabbits (diabetic), the EB and TB cells showed a more intense staining for CPTI, especially in the trophoblast.
