# Supplementary material for: Adiponectin stimulates lipid metabolism via AMPK in rabbit blastocysts
Source: PubMed Central journal article supplement — Hum Reprod. 2017 May 4;32(7):1382–92. doi: 10.1093/humrep/dex087 (PMC5850832; doi:10.1093/humrep/dex087), 2017-05-04
Supplement: dex087_suppl_table1.pdf [file dex087_suppl_table1.pdf]

**Supplementary Table S1 Serum range of glucose, insulin and adiponectin in non-diabetic and diabetic rabbits on day 6 p.c.**

|             | <b>Non-diabetic</b> | <b>Diabetic</b>   | <b>N values</b> | <b>Reference</b>               |
|-------------|---------------------|-------------------|-----------------|--------------------------------|
| Glucose     | 6.2 ± 0.1 mmol/l    | 27.8 ± 0.5 mmol/l | N = 3, n ≥ 9    | Haucke <i>et al.</i> (2014)    |
| Insulin     | 98 ± 0.62 pM        | 14 ± 0.5 pM       | N = 3, n ≥ 8    | Ramin <i>et al.</i> (2010)     |
| Adiponectin | 1.3 ± 0.4 µg/ml     | 4.5 ± 1.2 µg/ml   | N = 3, n = 11   | Schindler <i>et al.</i> (2013) |

Serum levels of glucose, insulin and adiponectin in non-diabetic and diabetic rabbits were measured and published previously (see reference).

## References

- Haucke E, Santos AN, Simm A, Henning C, Glomb MA, Gürke J, Schindler M, Fischer B, Santos AN. Accumulation of advanced glycation end products in the rabbit blastocyst under maternal diabetes. *Reproduction* 2014;148:169–178. doi:10.1530/REP-14-0149
- Ramin N, Thieme R, Fischer S, Schindler M, Schmidt T, Fischer B, Navarrete Santos A. Maternal diabetes impairs gastrulation and insulin and IGF-I receptor expression in rabbit blastocysts. *Endocrinology* 2010;151:4158–4167. doi:10.1210/en.2010-0187.
- Schindler M, Fischer S, Thieme R, Fischer B, Navarrete Santos A. cAMP-responsive element binding protein: a vital link in embryonic hormonal adaptation. *Endocrinology* 2013;154:2208–2221. doi:10.1210/en.2012-2096.
