# Supplementary material for: Adiponectin stimulates lipid metabolism via AMPK in rabbit blastocysts
Source: PubMed Central journal article supplement — Hum Reprod. 2017 May 4;32(7):1382–92. doi: 10.1093/humrep/dex087 (PMC5850832; doi:10.1093/humrep/dex087), 2017-05-04
Supplement: dex087_suppl_table2.pdf [file dex087_suppl_table2.pdf]

**Supplementary Table SII Primers used for RT-PCR and RT-qPCR.**

| Gene name     | Genbank number | T [°C] | Fragment [bp] | Sequence 5'→3'                                          |
|---------------|----------------|--------|---------------|---------------------------------------------------------|
| ATF2          | NM_001880      | 60     | 143           | fw: accatgcctgttgctattcc<br>rev: tctgactgactgggtgagg    |
| APPL1         | XM_017343898   | 60     | 113           | fw: agtgagggcagtttgtgt<br>rev: cccatcaaaaagcaaggta      |
| PPAR $\alpha$ | XM_002723354.3 | 60     | 146           | fw: ttggctgctatcatctgc<br>rev: gagttggggaagaggaagg      |
| CD36          | AF412572       | 60     | 242           | fw: ggggaaaacaggcacagat<br>rev: tgtgtcattctcggtccaa     |
| LPL           | NM_001177330.1 | 60     | 152           | fw: agaaccagactccaacgtcatt<br>rev: cattgtccagggtagttaa  |
| HSL           | XM_008249691.1 | 60     | 158           | fw: gacattgtcttcaccgcgc<br>rev: atcggggaggctgccgggc     |
| FABP4         | XM_002710655   | 60     | 228           | fw: tcagtgtgaatgggatgtg<br>rev: tgcattcaccaccagtta      |
| FATP4         | XM_002722970.1 | 60     | 131           | fw: cacctgtgactggagcactt<br>rev: gcgctctgtcttaaggagctt  |
| GAPDH         | L23961         | 60     | 144           | fw: gccgtctctctcgtgcag<br>rev: atggatcattgatggcgacaacat |
