# Supplementary material for: Adiponectin stimulates lipid metabolism via AMPK in rabbit blastocysts
Source: PubMed Central journal article supplement — Hum Reprod. 2017 May 4;32(7):1382–92. doi: 10.1093/humrep/dex087 (PMC5850832; doi:10.1093/humrep/dex087), 2017-05-04
Supplement: dex087_suppl_table3.pdf [file dex087_suppl_table3.pdf]

**Supplementary Table SIII Antibodies used for western blot and immunohistochemical analyses.**

| <b>Peptide/protein target</b> | <b>Name of antibody</b>                                | <b>Manufacturer, catalogue #, and/or name of individual providing the antibody</b> | <b>Species raised in; monoclonal or polyclonal</b> | <b>Dilution used</b>       |
|-------------------------------|--------------------------------------------------------|------------------------------------------------------------------------------------|----------------------------------------------------|----------------------------|
| Phospho-AMPK                  | Phospho-AMPK $\alpha$ (Thr172) antibody                | Cell Signalling, # 2531                                                            | Rabbit polyclonal antibody                         | 1:1000                     |
| AMPK                          | AMPK $\alpha$ antibody                                 | Cell Signalling, # 2532                                                            | Rabbit polyclonal antibody                         | 1:1000                     |
| Phospho-ACC                   | Phospho-Acetyl-CoA Carboxylase (Ser79) Antibody        | Cell Signalling, #3661                                                             | Rabbit polyclonal antibody                         | 1:1000                     |
| ACC2                          | Acetyl-CoA-Carboxylase 2                               | GeneTex, #GTX62736                                                                 | Rabbit monoclonal antibody                         | 1:1000                     |
| CPT I                         | CPTI antibody (E-7): sc-393070                         | Santa Cruz, #sc-393070                                                             | Mouse monoclonal antibody                          | 1:1000 (WB) or 1:100 (IHC) |
| PPAR $\alpha$                 | PPAR $\alpha$ polyclonal antibody                      | Cayman, #101710                                                                    | Rabbit polyclonal antibody                         | 1:1000                     |
| p38 MAPK                      | Phospho-p38 MAPK (Thr180/Tyr182) (12F8)                | Cell Signalling, # 4631                                                            | Rabbit monoclonal antibody                         | 1:1000                     |
| ATF2                          | ATF2 antibody (F2BR-1)                                 | Santa Cruz, #sc-242                                                                | Mouse monoclonal antibody                          | 1:1000                     |
| $\beta$ -Actin                | Monoclonal Anti- $\beta$ -Actin antibody Clone AC-15   | Sigma, A5441                                                                       | Mouse monoclonal antibody                          | 1:40000                    |
| Anti-rabbit (western blot)    | Polyclonal Goat Anti-Rabbit Immunoglobulin/HRP         | Dako, P0448                                                                        | IgG polyclonal                                     | 1:12000                    |
| Anti-mouse (western blot)     | Goat anti-mouse IgG (H + L)-HRPO                       | Dianova, I15-036-003                                                               | IgG polyclonal                                     | 1:20000                    |
| Anti-mouse (IHC)              | Dako EnVision + System-HRP labelled Polymer anti-mouse | Dako EnVision + System-HRP labelled Polymer, K4000                                 | Anti-mouse                                         | 1:2                        |
